# Supplementary figures and images for: Advances in genetic technologies result in improved diagnosis of mismatch repair deficiency in colorectal and endometrial cancers
Source: HighWire-hosted journal article supplement (doi:10.1136/jmedgenet-2020-107542), 2021-01-15

Supplementary figure 1b: EC samples tested.

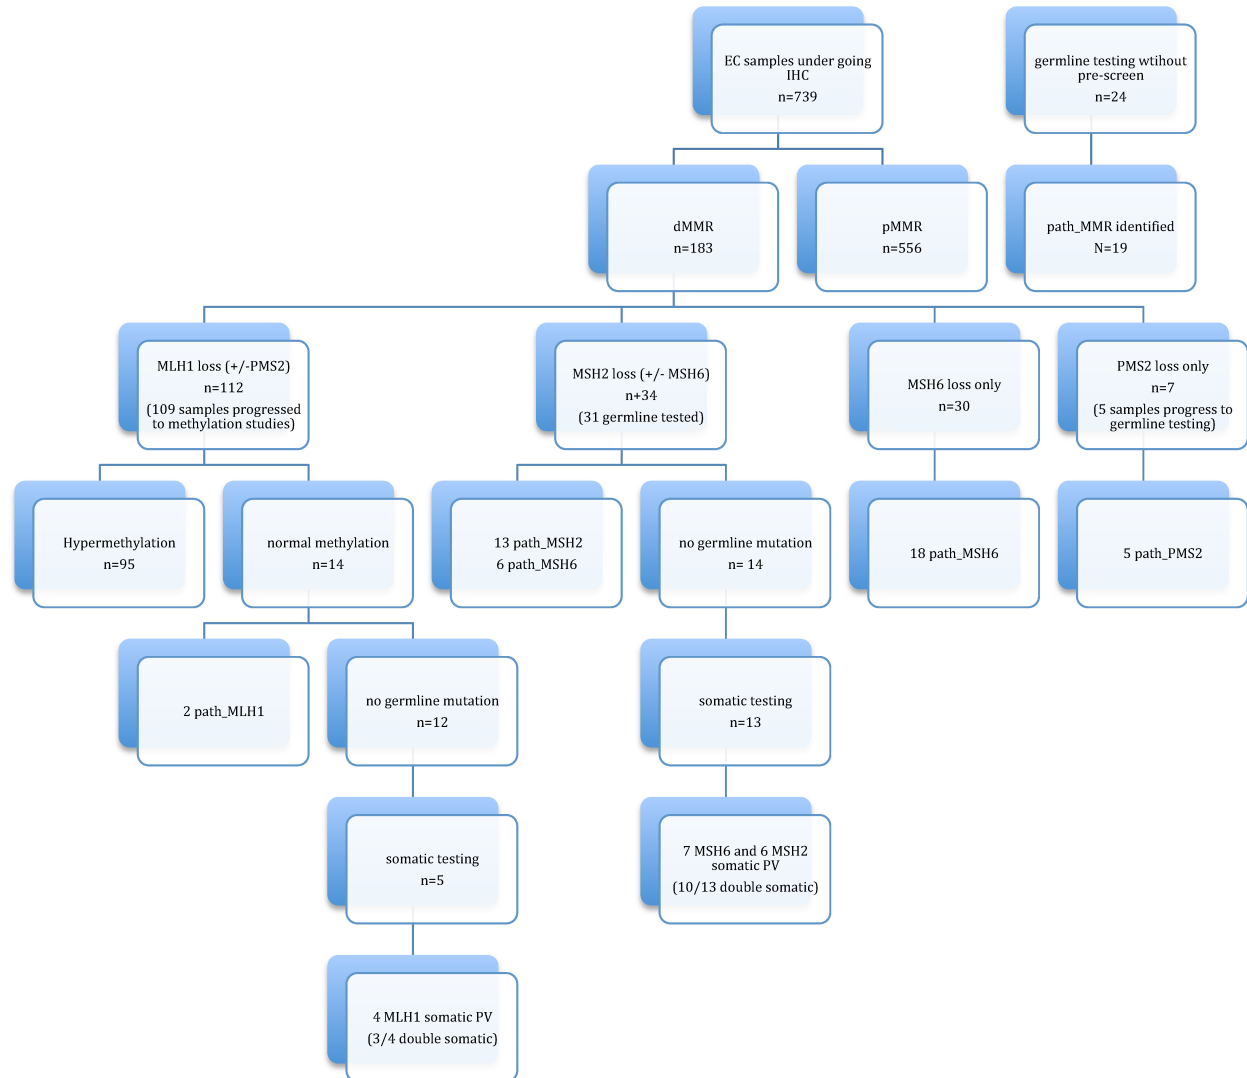

Supplement: jmedgenet-2020-107542supp002_data_supplement.pdf [file jmedgenet-2020-107542supp002_data_supplement.pdf]
